# Supplementary material for: Extrasynaptic NMDA receptor dependent long-term potentiation of hippocampal CA1 pyramidal neurons
Source: PubMed Central journal article supplement (PMC5465207; doi:10.1038/s41598-017-03287-7), 2017-06-08
Supplement: 41598_2017_3287_MOESM1_ESM.pdf [file 41598_2017_3287_MOESM1_ESM.pdf]

**Extrasynaptic NMDA receptor dependent long-term potentiation of  
hippocampal CA1 pyramidal neurons**

Qian Yang<sup>1#</sup>, Geng Zhu<sup>1#</sup>, Dandan Liu<sup>1</sup>, Jue-Gang Ju<sup>1</sup>, Zhen-Hua Liao<sup>1</sup>, Yi-Xin Xiao<sup>1</sup>,  
Yue Zhang<sup>1</sup>, Naijian Chao<sup>1</sup>, JieJie Wang<sup>2</sup>, Weidong Li<sup>1</sup>, Jian-Hong Luo<sup>2\*</sup>,  
Sheng-Tian Li<sup>1\*</sup>

<sup>1</sup>Key laboratory for the Genetics of Developmental and Neuropsychiatric Disorders (Ministry of Education), Bio-X Institutes, Shanghai Key Laboratory of Psychotic Disorders, Institute of Social Cognitive and Behavioral Sciences, and Brain Science and Technology Research Center, Shanghai Jiao Tong University, Shanghai, China.

<sup>2</sup>Department of Neurobiology, Key Laboratory of Medical, Neurobiology (Ministry of Health of China), Collaborative Innovation Center for Brain Science, School of Medicine, Zhejiang University, Hangzhou, Zhejiang 310058, China

\* luojianhong@zju.edu.cn; Tel.: +86-571-88208002; Fax: +86-571-88208002

\* lstian@sjtu.edu.cn; Tel.: +86-21-34208036; Fax: +86-21-34208035

# contributed equally to this work.

Figure 6

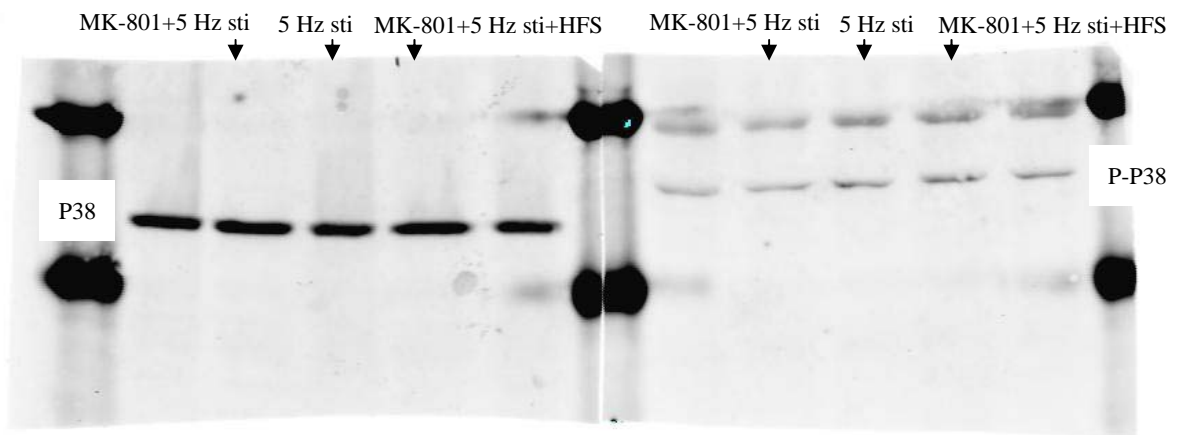

Figure S1. Full-length blots for the indicated figures from the main text.
